# Supplementary material
Source: Copernicus journal article supplement (doi:10.5194/acp-26-6655-2026)
Supplement: Supplementary file 1 [file acp-26-6655-2026-supplement.pdf]

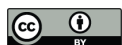

*Supplement of*

## **Assessment of regional and interannual variations in tropospheric ozone in chemical reanalyses**

**Dylan B. A. Jones et al.**

*Correspondence to:* Dylan B. A. Jones ([dbj@atmosph.physics.utoronto.ca](mailto:dbj@atmosph.physics.utoronto.ca))

The copyright of individual parts of the supplement might differ from the article licence.

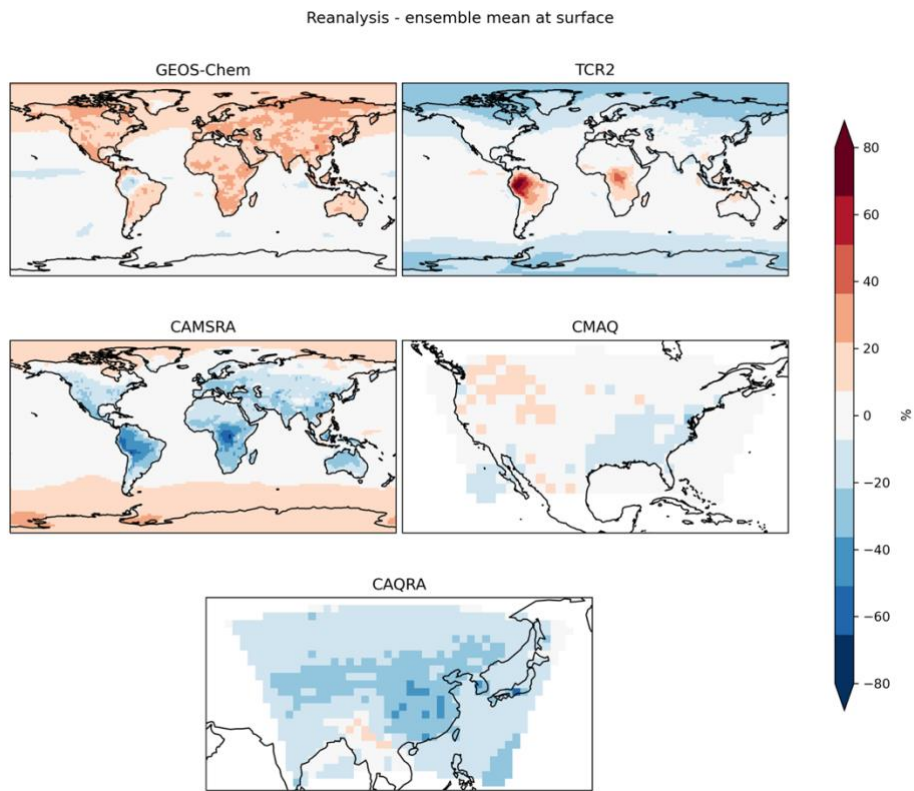

**Figure S1.** Relative mean differences (percent) between ozone in the individual reanalyses and the ensemble mean at the surface.

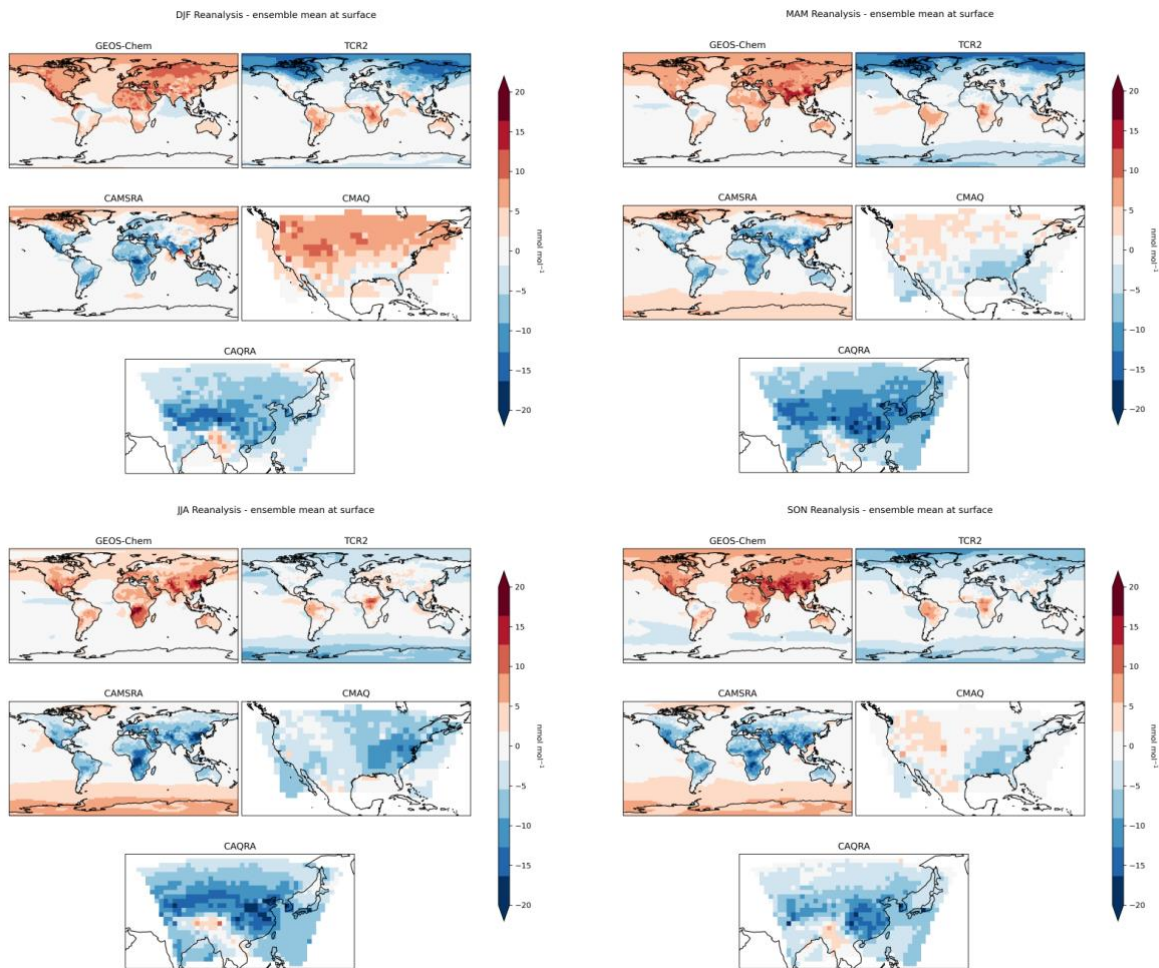

**Figure S2.** Seasonal mean differences ( $\text{nmol mol}^{-1}$ ) between ozone in the individual reanalyses and the ensemble mean at the surface.

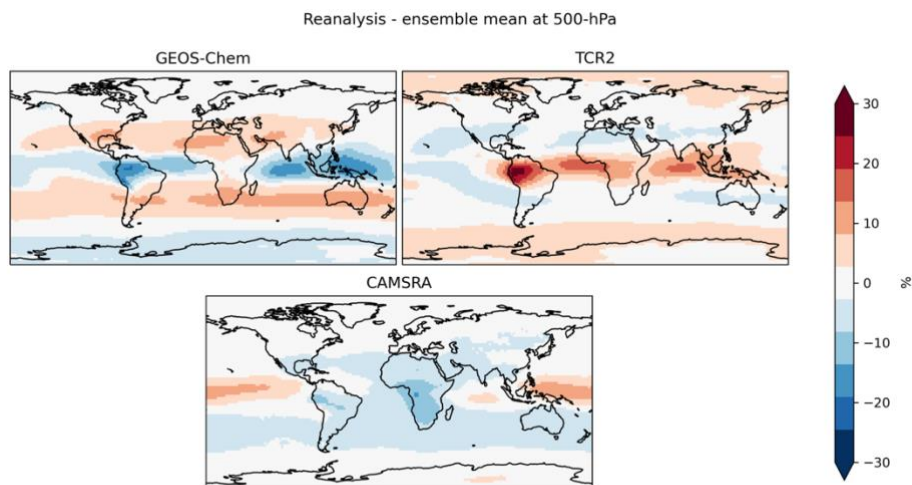

**Figure S3.** Relative mean differences (percent) between ozone in the individual reanalyses and the ensemble mean at 500 hPa.

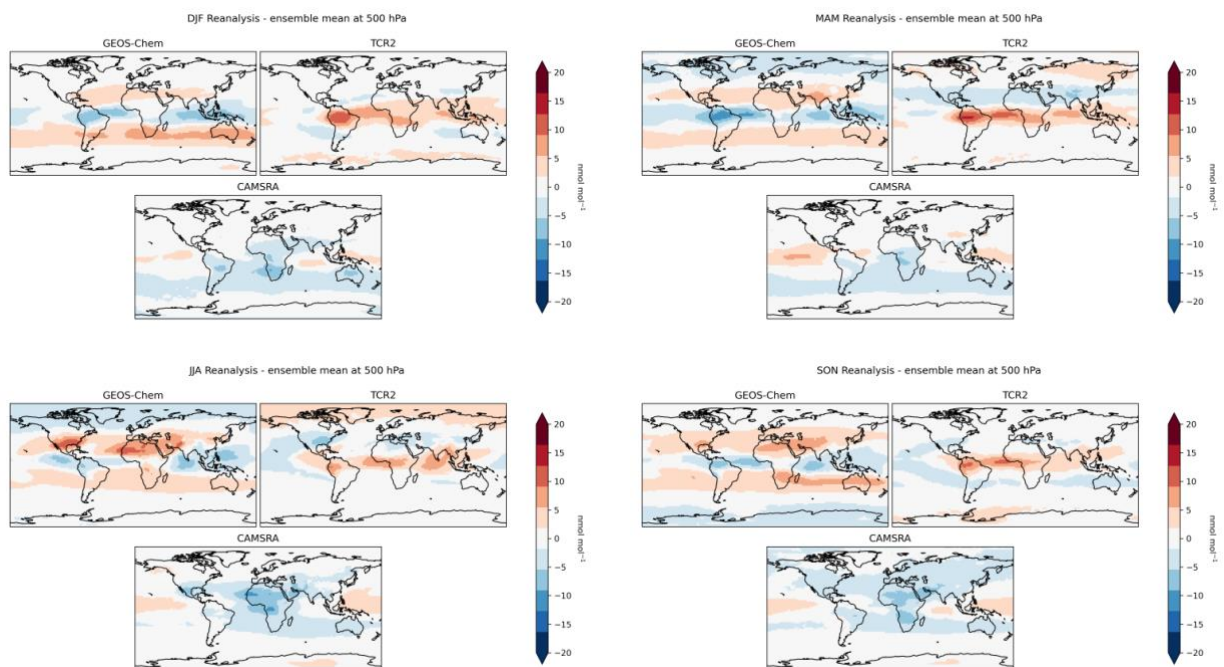

**Figure S4.** Seasonal mean differences (nmol mol<sup>-1</sup>) between ozone in the individual reanalyses and the ensemble mean at 500 hPa.

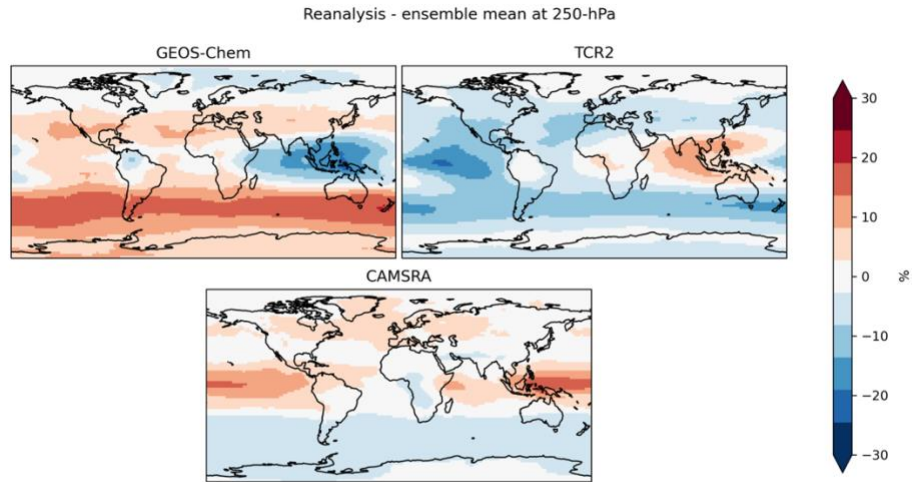

**Figure S5.** Relative mean differences (percent) between ozone in the individual reanalyses and the ensemble mean at 250 hPa.

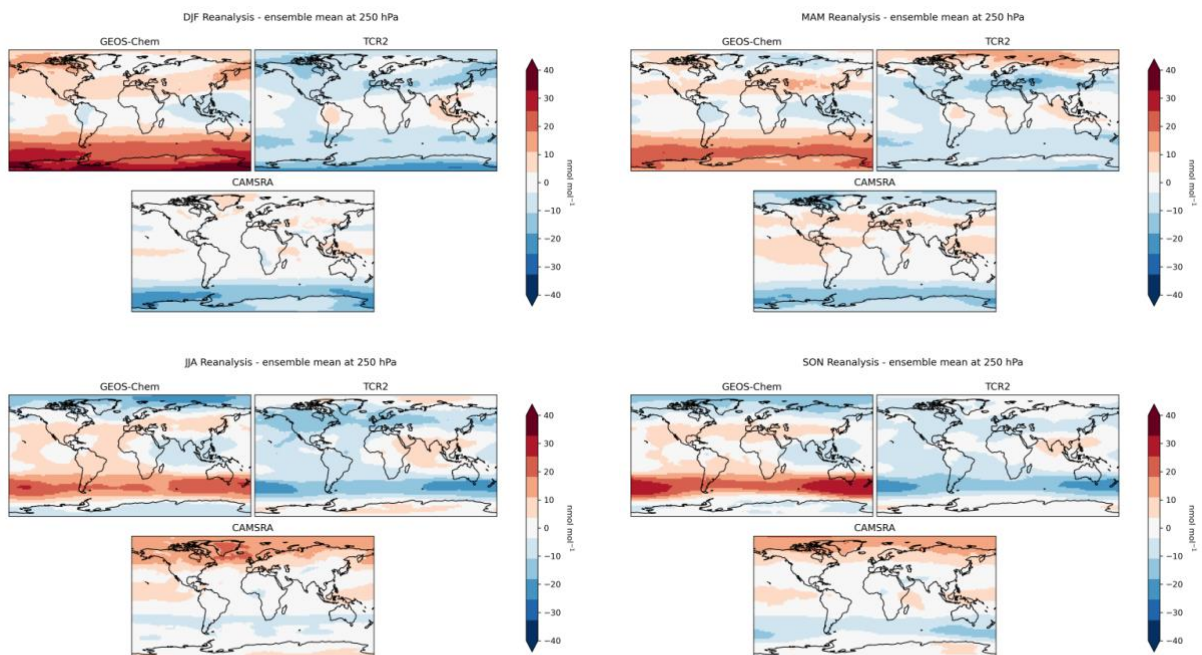

**Figure S6.** Seasonal mean differences ( $\text{nmol mol}^{-1}$ ) between ozone in the individual reanalyses and the ensemble mean at 250 hPa.

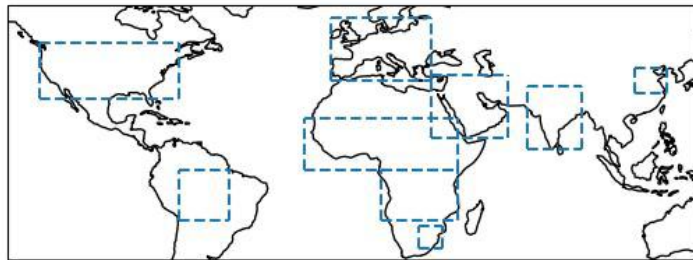

**Figure S7.** Regional domains used in the regional evaluation. The boundaries of the regions are given in Table 2.

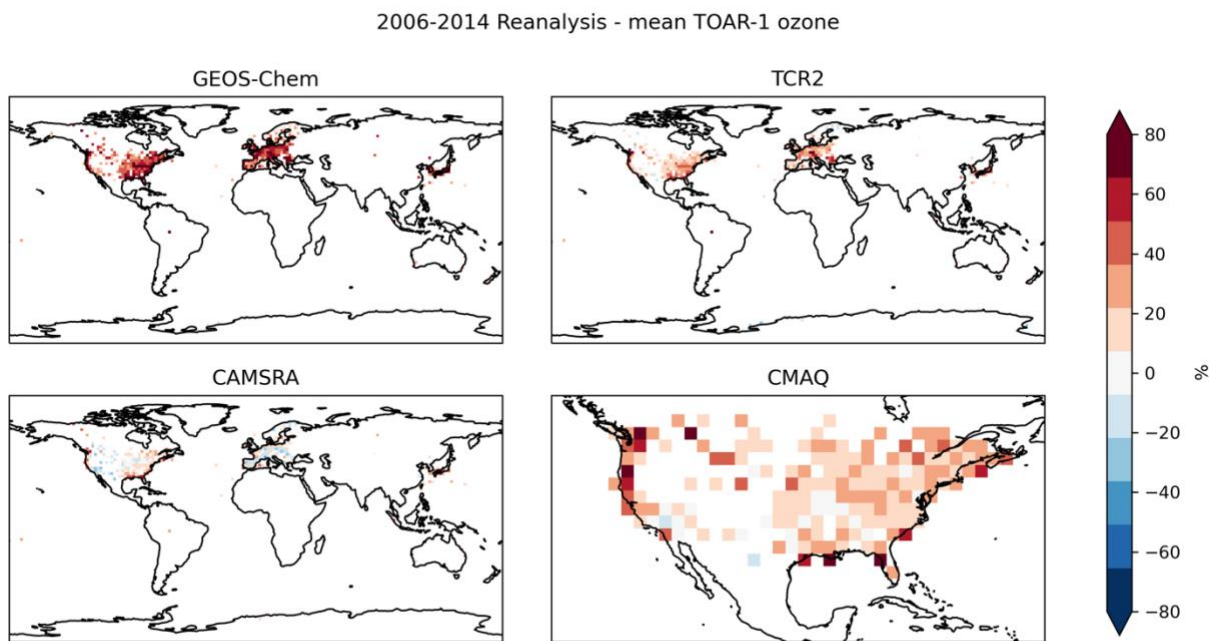

**Figure S8.** Relative mean bias (percent) between ozone in the individual reanalyses and the TOAR-I ozone observations (2006–2014) at the surface. The TOAR-I observations and the reanalyses were regridded onto a  $2^\circ \times 2^\circ$  grid and only rural observations were used in the comparison.

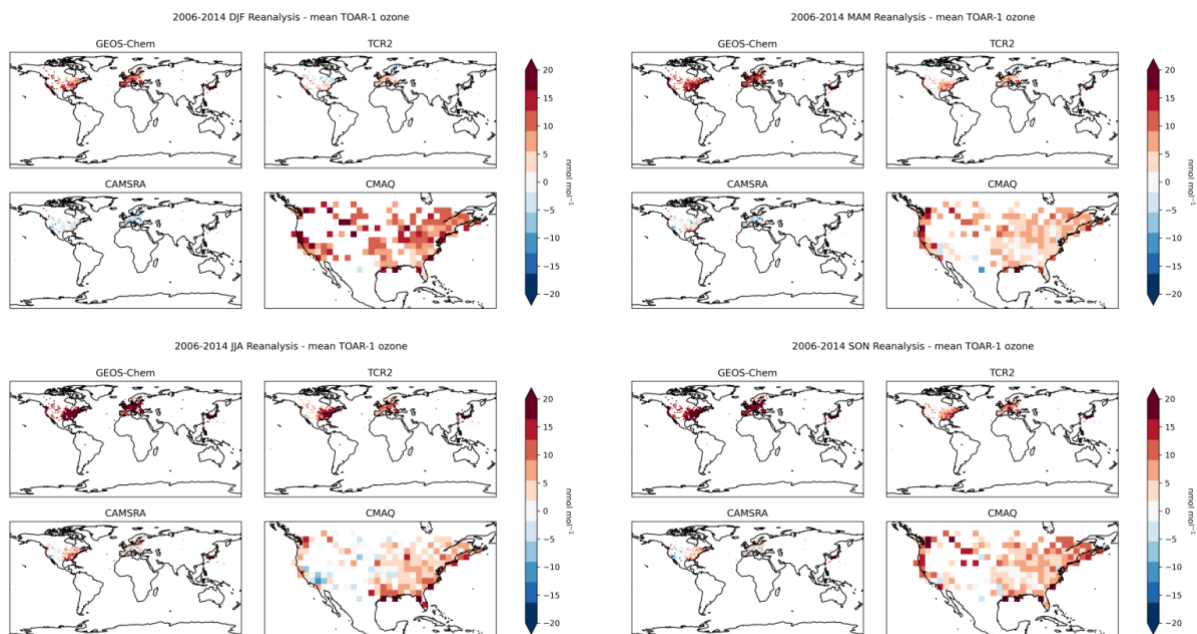

**Figure S9.** Seasonal mean bias ( $\text{nmol mol}^{-1}$ ) between ozone in the individual reanalyses and the TOAR-I ozone observations (2006–2014) at the surface. The TOAR-I observations and the reanalyses were regridded onto a  $2^\circ \times 2^\circ$  grid and only rural observations were used in the comparison.
